# Supplementary material for: Unique Responsiveness of Angiosperm Stomata to Elevated CO2 Explained by Calcium Signalling
Source: PubMed Central journal article supplement (PMC3835710; doi:10.1371/journal.pone.0082057), 2013-11-20
Supplement: pone.0082057.s002.pdf [file pone.0082057.s002.pdf]

```

PaMA_30172p0010 : -----*      20      *      40      *      60----- : -
AtSLAH3          : MEEKPNYVIQVEEELPTLLRKATTEEMVGFNDYKENGHPFPHSISRFP SHASTTTLNQ : 60

PaMA_30172p0010 : -----*      80      *     100      *     120----- : -
AtSLAH3          : ETSRSIDTMEAHHHNYNETTPWTHQRKPSISMPTSPNVLMISDPTTSLSENHKNSGSTG : 120

PaMA_30172p0010 : -----*     140      *     160      *     180----- : -
AtSLAH3          : KSVKFLSQPMTKVSSLYIESGNGDDRRQSHDNHHHLLHRQHQS GHHQNQNQAANKLKDN : 180
                                     ↑.....

PaMA_30172p0010 : -----*     200      *     220      *     240----- : -
AtSLAH3          : RYNSFKTWSGKLERQFTRKPA SVEPEAPNRRNNQNLNTNEAMPVDRY YDALEGPELETLRP : 240
                                     .CDPK23.....↑

PaMA_30172p0010 : -----*     260      *     280      *     300----- : -
AtSLAH3          : QE EIVLPNDKKWPFLLRYP ISTFGMCLGVSSQAIMWKT LATAEPTKFLHVP LWINQGLWF : 300

PaMA_30172p0010 : -----*     320      *     340      *     360----- : -
AtSLAH3          : ISVALILT IATIYLLK IILFFEAVRREYYHP I RINFF FAPFISLLFLALGV PPSIITDLP : 360

PaMA_30172p0010 : -----*     380      *     400      *     420----- : 38
AtSLAH3          : HFLWYLLMFPFICLELKIYQWMSGGQRRLSRVANP T N H L S V V G N F V G A L L G A S M G L R E G : 420

PaMA_30172p0010 : -----*     440      *     460      *     480----- : 98
AtSLAH3          : A I F F F A V G L A H Y L V L F V T L Y Q R L P T N E A L P K E L H P V F F L F V A A P S V A S V A W E K I Q G D F G Y : 480

PaMA_30172p0010 : -----*     500      *     520      *     540----- : 158
AtSLAH3          : V S K I A Y F I S L F L Y T S L V V R L N F F R G E R F S I T W W A Y T F P M T G A A V A T I K Y S N K I R H P I T Q S : 540

PaMA_30172p0010 : -----*     560      *     580      *     600----- : 209
AtSLAH3          : L A V T L S I I S S L T V F S L L L T T I L H A F V W G T L F P N D I S T A I T H R K H K S K K N K K ----- : 600

PaMA_30172p0010 : -----*     620      *-----D T L L S E L S L : 224
AtSLAH3          : S S E N I E N Y L K F T D S D S S Q S N D V E A C N G K T Q E S D S S - : 635

```
