# Supplementary material for: Unique Responsiveness of Angiosperm Stomata to Elevated CO2 Explained by Calcium Signalling
Source: PubMed Central journal article supplement (PMC3835710; doi:10.1371/journal.pone.0082057), 2013-11-20
Supplement: pone.0082057.s005.pdf [file pone.0082057.s005.pdf]

```

                *          20          *          40          *          60
PaMA_175194p0010 : ----- : -
PaMA_10428033p0010 : MNPIRPA  
SRIGSIFKKEEQRL  
LIIENDMKNYKSIDSTTS  
DGLHPVHGSV  
GSSSDQALQK  
L : 60
AtSLAC1 : -----MERK  
SNAHSTFAD  
NEVEDEAEQEL : 26

```

```

                *          80          *          100          *          120
PaMA_175194p0010 : ----- : -
PaMA_10428033p0010 : HKVDELEEBADYQEN  
QHSMEISKQ  
RLMSKLDK  
KFEPRGAVDFE  
VMMKCSVLS  
VVEGKTK  
CL : 120
AtSLAC1 : QQQENNNNKR  
FSGNRG  
PNRGKQ  
RPF  
RFGFSRQ  
VLETGFSV  
LNE-----  
SRERDDK  
SL : 80

```

↑...CDPK6...↑  
↑..OST1..↑

```

                *          140          *          160          *          180
PaMA_175194p0010 : -----MEN  
QNSFTTEERS  
DGIYGS  
GHR----- : 22
PaMA_10428033p0010 : KQKSNPLE  
CKLGRQ  
LSLTGFS  
RWKENG  
NSPKV  
IARSGAS  
FSGFS  
SNKSK  
EMMKDQ  
NYS : 180
AtSLAC1 : PR  
GRS  
FGFESG  
GGIN  
GDGR  
TDF  
SMFR  
TKT  
SKQ  
KSL  
LPSI  
IRE  
DIEN----- : 133

```

↑.....OST1.....↑

```

                *          200          *          220          *          240
PaMA_175194p0010 : -----DAGSV  
FLQSD  
VSEI  
TPAARY  
FQALE  
GPELE  
VLRD  
CENV  
GL : 61
PaMA_10428033p0010 : LFG  
TKS  
GNAL  
LQARK  
MEE  
QERQ  
DHN  
IQSR  
VHL  
NLPA  
R  
YFDAL  
GPEL  
E  
DVL  
K  
YED  
T-L : 239
AtSLAC1 : SLR  
ED  
GET  
KDD  
S-----INE  
NV  
SAG  
RYFA  
AL  
GPEL  
E  
VKN  
D  
NEDI  
-L : 175

```

```

                *          260          *          280          *          300
PaMA_175194p0010 : P  
VDK  
KW  
PFL  
LR  
FNAC  
FC  
GMC  
IGLAS  
QAS  
LW  
KAL  
ST  
SPAV  
KFL  
HIP  
EQ  
NIAL  
WLL  
AVC : 120
PaMA_10428033p0010 : LP  
LDK  
KW  
PFL  
LR  
FPI  
G  
CF  
GIC  
LGL  
G  
SQAL  
LW  
KSL  
SE  
VY  
FM  
KFL  
Q  
R  
L  
V  
I  
N  
V  
F  
W  
S  
L  
G  
L  
S : 299
AtSLAC1 : LP  
KEE  
Q  
W  
P  
F  
L  
L  
R  
F  
PI  
G  
C  
F  
G  
I  
C  
L  
G  
L  
S  
S  
Q  
A  
L  
W  
L  
L  
L  
A  
K  
S  
P  
A  
T  
N  
F  
L  
H  
I  
T  
P  
I  
N  
L  
V  
V  
W  
F  
S  
L  
V : 234

```

↑.....Motif1.....↑

```

                *          320          *          340          *          360
PaMA_175194p0010 : I  
L  
T  
V  
F  
C  
T  
Y  
F  
L  
K  
S  
T  
Y  
H  
F  
E  
A  
V  
K  
R  
E  
F  
C  
H  
P  
V  
R  
V  
N  
F  
F  
F  
A  
P  
W  
V  
A  
S  
M  
T  
L  
E  
I  
A  
V  
P  
P  
V  
I  
A  
---  
K  
S  
V  
H  
P : 177
PaMA_10428033p0010 : A  
L  
L  
I  
F  
I  
T  
Y  
S  
L  
K  
M  
F  
Y  
F  
E  
A  
V  
K  
R  
E  
Y  
H  
P  
V  
R  
V  
N  
F  
F  
F  
A  
P  
W  
I  
C  
M  
F  
L  
S  
I  
G  
V  
P  
E  
A  
I  
T  
---  
E  
H  
I  
H  
P : 356
AtSLAC1 : V  
L  
V  
S  
V  
S  
F  
T  
Y  
I  
L  
K  
I  
F  
Y  
F  
E  
A  
V  
K  
R  
E  
Y  
H  
P  
V  
R  
V  
N  
F  
F  
F  
A  
P  
W  
V  
C  
M  
F  
L  
I  
S  
V  
P  
P  
M  
F  
S  
P  
N  
R  
K  
Y  
L  
H  
P : 294

```

↑.....Motif2.....↑

```

                *          380          *          400          *          420
PaMA_175194p0010 : S  
V  
W  
C  
I  
F  
M  
P  
P  
L  
L  
L  
E  
L  
K  
I  
Y  
Q  
W  
L  
S  
G  
G  
E  
K  
R  
L  
S  
K  
V  
A  
N  
P  
S  
T  
H  
L  
S  
V  
V  
G  
N  
F  
V  
G  
S  
L  
L  
A  
R  
L  
E  
W  
K  
E  
A : 237
PaMA_10428033p0010 : A  
L  
W  
C  
I  
F  
M  
P  
P  
V  
F  
M  
L  
E  
L  
K  
I  
Y  
Q  
W  
L  
S  
G  
G  
K  
R  
R  
L  
S  
K  
V  
A  
N  
P  
S  
S  
H  
L  
S  
V  
V  
G  
N  
F  
V  
G  
L  
L  
A  
R  
V  
W  
K  
E  
A : 416
AtSLAC1 : A  
I  
W  
C  
V  
F  
M  
P  
P  
Y  
F  
F  
L  
E  
L  
K  
I  
Y  
Q  
W  
L  
S  
G  
G  
K  
R  
R  
L  
C  
K  
V  
A  
N  
P  
S  
S  
H  
L  
S  
V  
V  
G  
N  
F  
V  
G  
A  
I  
L  
A  
S  
K  
V  
G  
W  
D  
E  
V  
A : 354

```

↑.....Motif3.....↑

```

                *          440          *          460          *          480
PaMA_175194p0010 : K  
L  
I  
W  
A  
V  
G  
L  
A  
H  
Y  
L  
V  
L  
F  
V  
T  
L  
Y  
Q  
R  
L  
P  
T  
S  
E  
L  
P  
K  
E  
L  
H  
P  
V  
F  
E  
L  
F  
L  
A  
A  
P  
A  
S  
A  
W  
A  
E  
T  
I  
F  
G  
E  
F  
D  
T  
V : 297
PaMA_10428033p0010 : K  
E  
I  
W  
A  
V  
G  
L  
G  
H  
Y  
I  
V  
L  
F  
V  
T  
L  
Y  
Q  
R  
L  
P  
T  
S  
E  
A  
L  
P  
Q  
E  
L  
H  
P  
V  
F  
E  
L  
F  
I  
A  
A  
P  
C  
I  
A  
S  
A  
W  
A  
E  
I  
Y  
G  
D  
F  
D  
S  
V : 476
AtSLAC1 : K  
E  
I  
W  
A  
V  
G  
F  
E  
H  
Y  
L  
V  
V  
E  
V  
T  
L  
Y  
Q  
R  
L  
P  
T  
S  
E  
A  
L  
P  
K  
E  
L  
H  
P  
V  
Y  
S  
M  
F  
I  
A  
A  
P  
S  
A  
S  
I  
A  
W  
N  
I  
Y  
G  
D  
F  
D  
G  
C : 414

```

↑.....Motif4.....↑

```

                *          500          *          520          *          540
PaMA_175194p0010 : S  
R  
I  
M  
Y  
F  
V  
S  
L  
F  
I  
Y  
I  
S  
L  
V  
R  
I  
K  
L  
F  
G  
F  
R  
F  
S  
I  
S  
W  
W  
Y  
T  
Y  
P  
M  
N  
S  
V  
S  
I  
A  
T  
I  
R  
Y  
S  
E  
Q  
V  
E  
H  
L  
F  
T  
H  
V  
L : 357
PaMA_10428033p0010 : S  
R  
I  
A  
Y  
F  
I  
L  
F  
L  
Y  
I  
S  
L  
V  
R  
I  
N  
F  
F  
G  
F  
R  
F  
S  
V  
A  
W  
W  
Y  
T  
F  
P  
M  
A  
A  
V  
A  
T  
I  
R  
Y  
S  
E  
A  
V  
R  
C  
T  
A  
T  
K  
L : 536
AtSLAC1 : S  
R  
I  
C  
E  
F  
I  
L  
F  
L  
Y  
I  
S  
L  
V  
A  
R  
I  
N  
F  
F  
T  
G  
F  
K  
F  
S  
V  
A  
W  
W  
Y  
T  
F  
P  
M  
T  
A  
S  
V  
A  
T  
I  
K  
Y  
A  
E  
A  
V  
E  
G  
Y  
P  
S  
R  
A  
L : 474

```

↑.....Motif5.....↑

```

                *          560          *          580          *          600
PaMA_175194p0010 : A  
V  
L  
S  
T  
V  
A  
I  
I  
T  
V  
F  
S  
I  
F  
V  
I  
T  
L  
L  
H  
A  
F  
V  
W  
K  
T  
L  
F  
P  
N  
D  
M  
A  
I  
A  
I  
T  
T  
K  
Q  
R  
N  
I  
N  
K  
S  
P  
N  
K  
L  
K  
V  
Y  
D  
I : 417
PaMA_10428033p0010 : A  
L  
L  
S  
I  
I  
F  
T  
I  
V  
L  
L  
F  
V  
A  
T  
I  
L  
H  
A  
I  
S  
G  
S  
L  
F  
P  
N  
D  
L  
A  
I  
A  
I  
T  
K  
R  
Y  
K  
S  
K  
A  
L  
K  
E  
N  
K  
K  
T  
A  
A  
N  
S  
D  
F : 595
AtSLAC1 : A  
L  
L  
S  
F  
I  
S  
T  
A  
M  
V  
C  
V  
L  
F  
V  
S  
T  
L  
L  
H  
A  
F  
V  
W  
Q  
T  
L  
F  
P  
N  
D  
L  
A  
I  
A  
I  
T  
K  
R  
K  
L  
T  
---  
R  
E  
K  
K  
F  
K  
A  
Y  
D  
L : 530

```

↑..OST1..↑

```

                *          620          *          640          *          660
PaMA_175194p0010 : E  
C  
A  
N  
T  
K  
E  
K  
G  
P  
V  
R  
T  
S  
F  
E  
L  
K  
A  
T  
I  
R  
N  
H  
G  
R  
R  
E  
K  
P  
V  
Y  
E  
D  
N  
I  
L  
V  
D  
D  
K  
R  
E  
A  
D  
E  
E  
Q  
M  
L  
D  
R  
S  
A  
S  
P  
K  
N : 477
PaMA_10428033p0010 : E  
Q  
L  
H  
A  
S  
E  
---  
I  
Q  
G  
M  
D  
F  
T  
M  
K  
S  
---  
Q  
T  
E  
V  
A  
H  
E  
D  
P  
I  
F  
N  
H  
K  
L  
P  
--- : 632
AtSLAC1 : K  
R  
W  
T  
K  
Q  
A  
---  
L  
A  
K  
I  
S  
A  
E  
K  
D  
F  
E  
A  
E  
E  
E  
S  
H  
--- : 556

```

```

PaMA_175194p0010 : AGHGPLD : 484
PaMA_10428033p001 : ----- : -
AtSLAC1 : ----- : -

```
