# Supplementary material for: Unique Responsiveness of Angiosperm Stomata to Elevated CO2 Explained by Calcium Signalling
Source: PubMed Central journal article supplement (PMC3835710; doi:10.1371/journal.pone.0082057), 2013-11-20
Supplement: pone.0082057.s006.pdf [file pone.0082057.s006.pdf]

```

*          20          *          40          *          60
Sm53394 : ----- : -
Sm53336 : ----- : -
Sm122390 : ----- : -
Sm31887 : ----- : -
AtSLAC1 : MERKQSNASHSTFADINEVEDEAEQELQQQENNNKRFSGNRGNRGRKQRFGRFSRQVSL : 60
                                     ↑...
                                     ↑.OST1

*          80          *          100         *          120
Sm53394 : -----EKYVLFRTSSK-IEKQLSRLREEEIQQQQ : 29
Sm53336 : -----YNLFKTRSSKSLKQIPWLSKQ----- : 22
Sm122390 : ----- : -
Sm31887 : ----- : -
AtSLAC1 : ETGFSVLNRESRERDDKKS LPRSGRSGFGGFESGGIINGGDGRKTDFSMFRKSTLSKQKS : 120
          CDPK6...↑          ↑...OST1...↑          ↑.....OST1.....
          ...↑

*          140         *          160         *          180
Sm53394 : QQHHQLDPGDHPEQQQSSKPIHHEDHSAQVVPAGRYFDALOGPELHQLKESEE-ALLPLD : 88
Sm53336 : -----NGDAPPKFET-----DEELPAGRFFDALOGPELVLDSEDI-LLPLD : 65
Sm122390 : -----MDEESALGTT--SNAP-----VPTGRYFDALOGPELVVESEODI-LLPLD : 44
Sm31887 : AAAAAATAATTA AVNGD--PTS PRPLEANVPAGRYFDALOGPELVLESEDI-LLPLD : 57
AtSLAC1 : LLPSIIRERDIENSLRTEDGETKDDSENENVSAGRYFAALRGPELDEVKDNEI-LLPLKE : 179
          ..↑

*          200         *          220         *          240
Sm53394 : CRWPFLLRFPISSEFGVALGLGSQSILWKNLSTVEAMRFL-FAPEITNTVLWFLAAIALAG : 147
Sm53336 : QKWPFLLRVPANVFGVSIGLSAQSLLWAEIHDASSLSYLKHPKGVLFALWSIGV FVHTV : 125
Sm122390 : KVWPFLLRFPVNSFGIVLGLGSQGLLWKSLSSTFAEEFVHLPKQVNLVLWCATLLAFVA : 104
Sm31887 : CTWPFLLRFPINSFGIVLGLGSQITLWKKLSLMSMR-FLHIFLHINFLWCVALCAYTL : 116
AtSLAC1 : EQWPFLLRFPISGFGVHCLGLSSQAVLWLAALAKSEATN-FLHITPLINLWVWFLSLVVLVS : 238
          ↑.....Motif1.....↑

*          260         *          280         *          300
Sm53394 : IFTIYLFKALIFYLAEAVRREYVHPVRANFFFPANVIAAMFLALGIPPSAGVT---LHPWLWC : 204
Sm53336 : IFSAMALKQVVFYEA VRREFHHPVRVNYFFAPVVAAMFLALSTPKDIAKR---LHPWLWG : 182
Sm122390 : ISLFIYLLKQFLYEA VRREFHHPVRINFFAPCTGGMFLALGIPDAVGLS---LHPSVWC : 161
Sm31887 : ISLTIYVCKICIFYEA VRREFHHPVRINFFAPVVCGMFLALGVPPTIAAS---IHPAWL : 173
AtSLAC1 : VSFIIYLLKCIIFYEA VKREYVHPVRVNYFFAPVVCMLALISVPPMFSNPKYLLHPALWC : 298
          ↑.....Motif2.....↑

*          320         *          340         *          360
Sm53394 : CLMAPFLALELKIYQWLSSGGQRRLSKVANPCTHLSVVGNFVGA LLGATVGVWIDGGLEFFW : 264
Sm53336 : VEMGPVEALEVKIYQWLEGGERRLSKVANPPTHIALTGNFVGSLLSHVVGWKEFAFLF : 242
Sm122390 : LLMAPFLLELKIYQWLSGGDRRLSKVANPSTHLSIVGNFVGAVLGARVGVWKEPAMFFW : 221
Sm31887 : VEMSPILVLELKIYQWLSGGERRLSKVANPPTHVSVGNFVGSLLGATVEWKEFLATEFFW : 233
AtSLAC1 : VEMGFYFLELKIYQWLSGGKRRLLCKVANPSSHLSVVGNFVGA LLASKVWDEVAKELW : 358
          ↑.....Motif3.....↑

*          380         *          400         *          420
Sm53394 : AIGLAHYLVFVFLYQRLPTNEALPKELHPVFLFIAAPSAASIAWEKITGDFGIVSRIA : 324
Sm53336 : AVGLAHYVFLVFLYQRLPTNETLPKELHPVFLFIAAPSAASEAWEMLAGSFDYPARLI : 302
Sm122390 : AVGLAHYVFLVFLYQRLPTNKRLLPKDLHPVFLFVAAPSTASVAVEDITGSGFYVSRIV : 281
Sm31887 : AVGLAHYVFLVFLYQRLPTNELLRDMHPVYELFLAVPSTASVAVKITSDFGYVSKLV : 293
AtSLAC1 : AVGLAHYLVVFLYQRLPTSEALPKELHPVYSMFIAAPSAASIAWNITLYCGDFGSRFC : 418
          ↑.....Motif4.....↑

*          440         *          460         *          480
Sm53394 : FFIALFLFSSL-----IVRINFFRGFRFSLAWWAYTFPMTAISIASIHCQEVSTPVTQ : 378
Sm53336 : HFVGLFLFISL-----IVRLNFFRGFRFSLAWWAYTFPVAIAMTANRMLGLVSSWITD : 356
Sm122390 : YFVSLFLFISL-----VVRVNLFRGFRFSLAWWAYTFPLGAAAIATIHYSAYTCTLTR : 335
Sm31887 : FFLGLFLFISLRLRFYMQVVRVSIFFRGFKFSLTWWAYTFPLTAVAIASIHMAVREPGLFTQ : 353
AtSLAC1 : FFIALFLFISL-----VARINFFRGFKFSVAWWSYTFPMTASVATIKVAEAWPGYFSR : 472
          ↑.....Motif5.....↑

*          500         *          520         *          540
Sm53394 : ALATILSSVSSATVALLFVATMCHWLWVWTLFPNDLAIATINRRRKRKR----- : 427
Sm53336 : AMTFFFI LSVAVACVVLVLSILHAWLWGTLLPNDMAIATITHKKK----- : 403
Sm122390 : FLVVALSLASVIVVVSIFVITLACACLYGTLPNDQAIATISEQHRKQHLCKQQA---- : 391
Sm31887 : GLATVISVAVTVVFLVFLVHAFVVRVTLFPNDIAIATRKK----- : 397
AtSLAC1 : ALATLISLSTAVVCLVSLFLHAFVWGTLPNDLAIATIKRKLTRKPKFRAYDLKR : 532
          ↑..OST1..↑

*          560
Sm53394 : ----- : -
Sm53336 : ----- : -
Sm122390 : ----- : -
Sm31887 : ----- : -
AtSLAC1 : WTKQALAKKISAEKDFEAEESH : 556

```
